# Supplementary material
Source: publisher figshare collection journal article supplement (https://acs.figshare.com/ndownloader/files/3967960)
Supplement: Supplementary file 1 [file 3967960]

## Supporting Information

### Visualizing and Quantifying Protein PolySUMOylation at the Single-Molecule Level

Yong Yang and Chun-yang Zhang\*

Single-molecule Detection and Imaging Laboratory, Shenzhen Institutes of Advanced Technology,  
Chinese Academy of Sciences, Shenzhen, 518055, China

\*To whom correspondence should be addressed. E-mail: zhangcy@siat.ac.cn

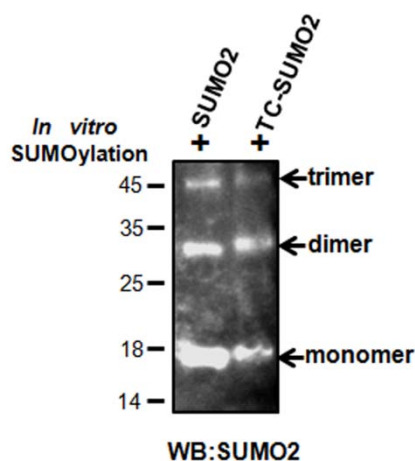

**Figure S1.** *In vitro* SUMOylation reaction of SUMO-2 and TC-SUMO2. The SUMOylation reaction was performed in the presence of either 50 ng of SUMO-2 or 40 ng of TC-SUMO2 at 37°C for 2 h. The reaction products were harvested for SDS-PAGE and subsequent western blotting analysis with SUMO2-specific antibodies. The positions of the SUMO monomers and multimers are indicated.

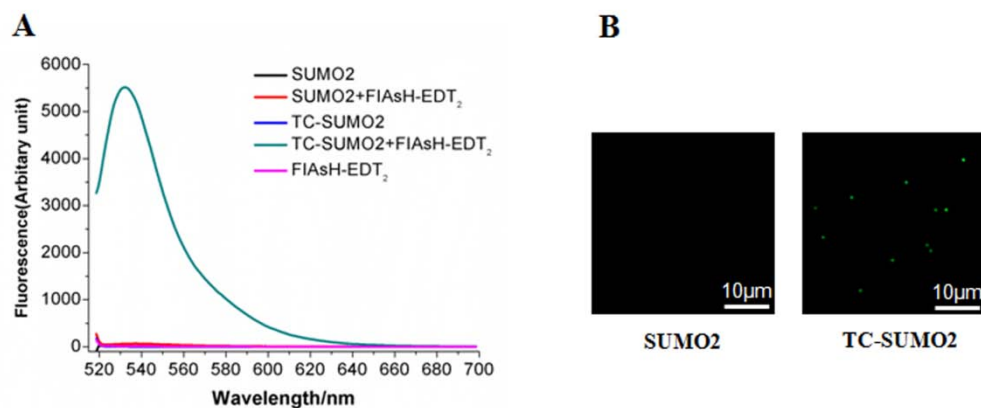

**Figure S2.** (A) Fluorescence emission spectra of SUMO-2 and TC-SUMO2 protein complex with and without FIAsH-EDT<sub>2</sub> labeling, respectively. The FIAsH-EDT<sub>2</sub> dye was used as the negative control ( $\lambda_{ex} = 510$  nm). (B) Representative images of SUMO-2 (left panel) and TC-SUMO2 (right panel) protein complexes with FIAsH-EDT<sub>2</sub> labeling at the single-molecule level.

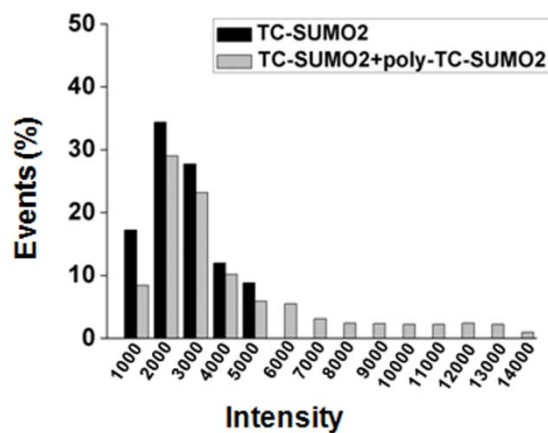

**Figure S3.** Intensity distribution histogram of TC-SUMO2 proteins without (black) and with (grey) *in vitro* SUMOylation reaction.

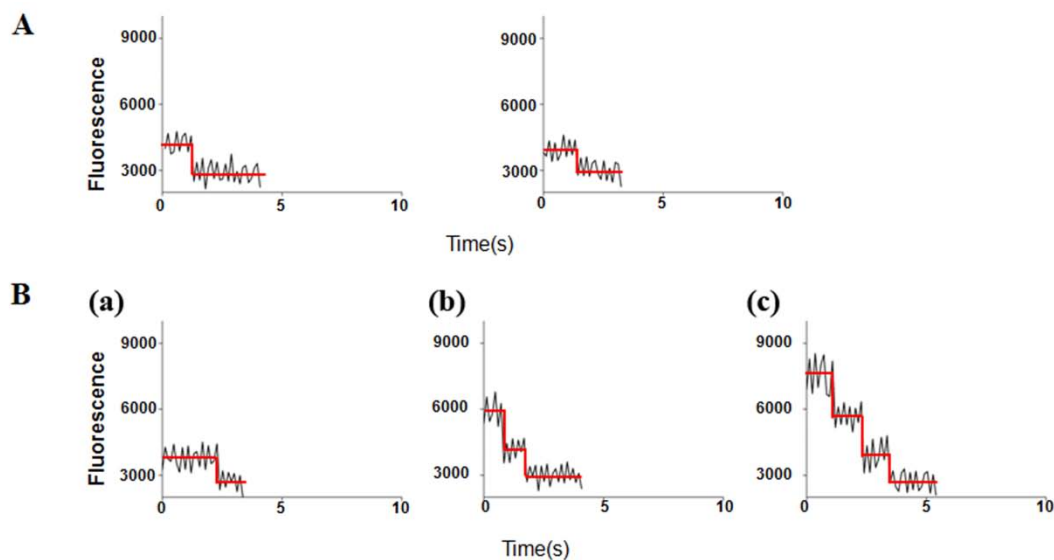

**Figure S4.** Representative intensity profiles (black) and the results of the step fitting algorithm (red) obtained from TC-SUMO2 without (A) and with (B) *in vitro* SUMOylation reaction. Note: the panel B contain a mixture of monomeric (a), dimeric(b) and trimeric(c) SUMO.

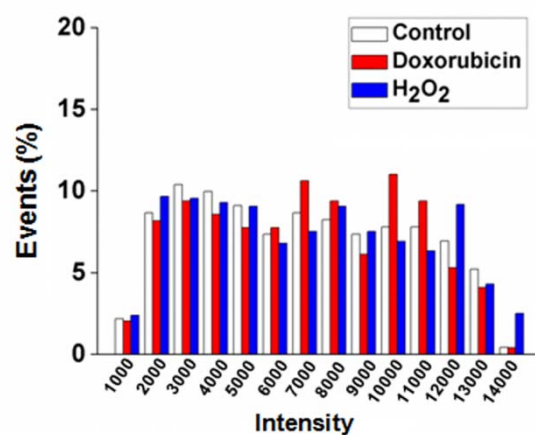

**Figure S5.** Intensity distribution histogram of SUMOylated Sp100 under the basal condition (white) and the stimulation by doxorubicin (red) and H<sub>2</sub>O<sub>2</sub> (blue).
